# Supplementary material for: Fabrication and electrochemical performance of 3D hierarchical β-Ni(OH)2 hollow microspheres wrapped in reduced graphene oxide
Source: Royal Society of Chemistry journal article supplement (doi:10.1039/c3ta11161j), 2013-01-01
Supplement: c3ta11161j.pdf [file c3ta11161j.pdf]

## Electronic Supporting Information

### **Fabrication and electrochemical performances of 3D hierarchical $\beta$ -Ni(OH)<sub>2</sub> hollow microspheres wrapped in reduced graphene oxide**

**Yan Wang, Shili Gai, Na Niu, Fei He, and Piaoping Yang,\***

*Key Laboratory of Superlight Materials and Surface Technology, Ministry of Education, Harbin Engineering University, Harbin 150001, P. R. China*

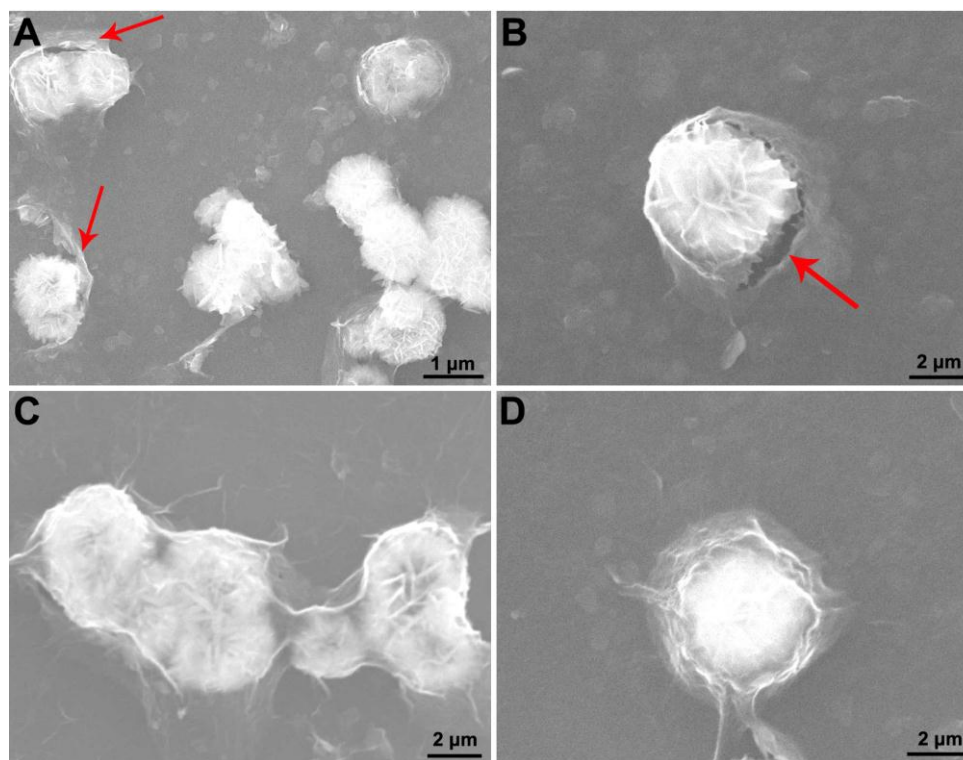

**Fig. S1** SEM images of simply mixed rGO/Ni(OH)<sub>2</sub> (A, B), SEM images of rGO/ $\beta$ -Ni(OH)<sub>2</sub> composite (C, D).

**Table S1** The mass of the electrode materials including  $\beta$ -Ni(OH)<sub>2</sub> spheres, simply mixture of rGO and Ni(OH)<sub>2</sub> spheres, rGO/ $\beta$ -Ni(OH)<sub>2</sub> composite.

| electrode materials    | $\beta$ -Ni(OH) <sub>2</sub> spheres | simply mixture of rGO and Ni(OH) <sub>2</sub> spheres | rGO/ $\beta$ -Ni(OH) <sub>2</sub> composite |
|------------------------|--------------------------------------|-------------------------------------------------------|---------------------------------------------|
| Mass of electrode (mg) | 5.3                                  | 5.7                                                   | 5.5                                         |
